# Supplementary material for: Integrated (Meta) Genomic and Synthetic Biology Approaches to Develop New Biocatalysts
Source: Mar Drugs. 2016 Mar 21;14(3):62. doi: 10.3390/md14030062 (PMC4810074; doi:10.3390/md14030062)
Supplement: Supplementary File 1 [file marinedrugs-14-00062-s001.xlsx]

## Sheet: Sheet1
LIPASE/ESTERASE			GC/Microbiome		Metagenome	Gene count	GC/MG		Metagenome	Gene count	GC/MG		Metagenome	Gene count	GC/MG
Acetyl esterase/lipase	Microbiome	Gene count		Ecosystem				E. category				E. type
COG0657	3966	5319315	1341.23	Engineered	274	97295	355.091	Air	31	5786	186.645	Fresh water	643	567818	883.076
				Environmental	2526	4436400	1756.29	Aquatic	1514	1592975	1052.16	Marine	663	996817	1503.49
				Host-Associated	1166	785620	673.774	Terrestrial	976	2837639	2907.42	Thermal springs	133	6756	50.797
Esterase/lipase	Microbiome			Ecosystem				E. category				E. type
COG1647	3697	1167534	315.806	Engineered	264	25845	97.8977	Air	31	1059	34.1613	Fresh water	666	147571	221.578
				Environmental	2438	988519	405.463	Aquatic	1471	401416	272.886	Marine	608	242849	399.423
				Host-Associated	995	153170	153.94	Terrestrial	936	586444	626.543	Thermal springs	123	3815	31.0163
PROTEASE
Serine protease, subtilisin family	Microbiome			Ecosystem				E. category				E. type
COG1404	3898	2048642	525.562	Engineered	276	60038	217.529	Air	31	1206	38.9032	Fresh water	637	201503	316.331
				Environmental	2495	1628830	652.838	Aquatic	1515	565824	373.481	Marine	663	323553	488.014
				Host-Associated	1123	359774	320.369	Terrestrial	949	1061800	1118.86	Thermal springs	132	16417	124.371
Serine protease, subtilase family	Microbiome			Ecosystem				E. category				E. type
COG1572	2770	300286	108.406	Engineered	231	14923	64.6017	Air	21	66	3.14286	Fresh water	504	38104	75.6032
				Environmental	2098	257976	122.963	Aquatic	1275	133104	104.395	Marine	603	85940	142.521
				Host-Associated	441	27387	62.102	Terrestrial	802	124806	155.618	Thermal springs	104	3927	37.7596
NITRILASE
Predicted amidohydrolase	Microbiome			Ecosystem				E. category				E. type
COG0388	4017	7670899	1909.61	Engineered	285	155313	544.958	Air	31	6557	211.516	Fresh water	679	857864	1263.42
				Environmental	2606	6627232	2543.07	Aquatic	1590	2986613	1878.37	Marine	674	2040755	3027.83
				Host-Associated	1126	888354	788.947	Terrestrial	985	3634042	3689.38	Thermal springs	154	25377	164.786
LACCASE
Copper oxidase (laccase) domain	Microbiome			Ecosystem				E. category				E. type
COG1496	3830	1697010	443.084	Engineered	271	45757	168.845	Air	31	1956	63.0968	Fresh water	668	212379	317.933
				Environmental	2464	1443552	585.857	Aquatic	1503	744318	495.222	Marine	632	513993	813.28
				Host-Associated	1065	207701	195.024	Terrestrial	930	697278	749.761	Thermal springs	129	6271	48.6124
CELLULASE
BglB	Microbiome			Ecosystem				E. category				E. type
COG2723	3945	3520788	892.468	Engineered	264	107860	408.561	Air	31	3974	128.194	Fresh water	642	340101	529.752
				Environmental	2486	2909223	1170.24	Aquatic	1486	1121339	754.602	Marine	624	748352	1199.28
				Host-Associated	1195	503005	420.925	Terrestrial	469	1784610	3805.14	Thermal springs	146	13310	91.1644
Cellobiohydrolase	Microbiome			Ecosystem				E. category				E. type
COG5297	2726	301616	110.644	Engineered	184	5390	29.2935	Air	24	194	8.08333	Fresh water	450	19952	44.3378
				Environmental	1980	239466	120.942	Aquatic	1059	56318	53.1804	Marine	516	34797	67.436
				Host-Associated	562	56760	100.996	Terrestrial	897	182954	203.962	Thermal springs	40	557	13.925
TRANSAMINASES
ArgD: Acetylornithine/succinyldiaminopimelate/putrescine aminotransferase	Microbiome			Ecosystem				E. category				E. type
COG4992	4007	7145902	1783.35	Engineered	285	143741	504.354	Air	31	6051	195.194	Fresh water	681	735561	1080.12
				Environmental	2617	6245517	2386.52	Aquatic	1591	3270537	2055.65	Marine	674	2455157	3642.67
				Host-Associated	1105	761644	689.271	Terrestrial	995	2963929	2978.82	Thermal springs	82	54479	664.378
Adenosylmethionine-8-amino-7-oxononanoate aminotransferase	Microbiome			Ecosystem				E. category				E. type
COG0161	3977	7034838	1768.88	Engineered	283	48701	172.088	Air	31	6384	205.935	Fresh water	675	659524	977.073
				Environmental	2579	6162044	2389.32	Aquatic	1564	2807849	1795.3	Marine	669	2092405	3127.66
				Host-Associated	1115	774093	694.254	Terrestrial	984	3347811	3402.25	Thermal springs	137	12384	90.3942
XYLANASE
Endo-1,4-beta-xylanase, GH35 family	Microbiome			Ecosystem				E. category				E. type
COG3693	3207	1475810	460.184	Engineered	244	32269	132.25	Air	31	1062	34.2581	Fresh water	562	125655	223.585
				Environmental	2243	1188233	529.752	Aquatic	1302	514325	395.027	Marine	566	373341	659.613
				Host-Associated	720	255308	354.594	Terrestrial	910	672846	739.391	Thermal springs	106	4611	43.5
LYASE
Pectate lyase	Microbiome			Ecosystem				E. category				E. type
COG3866	3357	321106	95.6527	Engineered	403	10087	25.0298	Air	28	334	11.9286	Fresh water	504	20831	41.3313
				Environmental	2135	233880	109.546	Aquatic	1217	98283	80.7584	Marine	573	74648	130.276
				Host-Associated	819	77139	94.1868	Terrestrial	888	135256	152.315	Thermal springs	80	1214	15.175
Argininosuccinate lyase	Microbiome			Ecosystem				E. category				E. type
COG0165	4532	5346205	1179.66	Engineered	514	118838	231.202	Air	31	4388	141.548	Fresh water	691	553395	800.861
				Environmental	2834	4550553	1605.7	Aquatic	1751	2290063	1307.86	Marine	785	1675083	2133.86
				Host-Associated	1184	676814	571.633	Terrestrial	1050	2255852	2148.43	Thermal springs	185	20271	109.573
ABM Superfamily	Microbiome			Ecosystem				E. category				E. type
Antibiotic biosynthesis monooxygenase	3048	298447	97.9157	Engineered	379	6367	16.7995	Air	30	247	8.23333	Fresh water	608	24753	40.7122
COG3224				Environmental	2263	237950	105.148	Aquatic	1303	64393	49.419	Marine	593	38333	64.6425
				Host-Associated	406	54130	133.325	Terrestrial	929	173309	186.554	Thermal springs	48	276	5.75
CYTOCHROME P450	Microbiome			Ecosystem				E. category				E. type
COG2124	3932	11929641	3033.99	Engineered	423	108397	256.258	Air	31	9061	292.29	Fresh water	672	1063373	1582.4
				Environmental	2720	9761030	3588.61	Aquatic	1636	2187201	1336.92	Marine	752	1089301	1448.54
				Host-Associated	789	2060214	2611.17	Terrestrial	1051	7564753	7197.67	Thermal springs	82	23863	291.012
LACTONASE	Microbiome			Ecosystem				E. category				E. type
Glyoxylase or a related metal-dependent hydrolase, beta-lactamase superfamily II	4559	8118821	1780.83	Engineered	520	193972	373.023	Air	31	5187	167.323	Fresh water	693	802731	1158.34
COG0491				Environmental	2859	6558295	2293.91	Aquatic	1758	2422942	1378.24	Marine	788	1542135	1957.02
				Host-Associated	1180	1366554	1158.1	Terrestrial	1068	4129889	3866.94	Thermal springs	186	26880	144.516
GLYCINE OXIDASE	Microbiome			Ecosystem				E. category				E. type
Glycine/D-amino acid oxidase (deaminating)	4503	8159618	1812.04	Engineered	506	179315	354.377	Air	31	6018	194.129	Fresh water	684	757973	1108.15
COG0665				Environmental	2834	6580043	2321.82	Aquatic	1746	2620603	1500.92	Marine	789	1802797	2284.91
				Host-Associated	1163	1400260	1204.01	Terrestrial	1055	3953264	3747.17	Thermal springs	182	18506	101.681
GLYCOSIDE HYDROLASE	Microbiome			Ecosystem				E. category				E. type
Glycosidase	4537	7012400	1545.6	Engineered	494	194034	392.781	Air	31	6471	208.742	Fresh water	678	648819	956.96
				Environmental	2785	5691266	2043.54	Aquatic	1690	1924645	1138.84	Marine	749	1215168	1622.39
				Host-Associated	1258	1127100	895.946	Terrestrial	1062	3759884	3540.38	Thermal springs	173	18010	104.104
